# Supplementary material
Source: ML conference proceedings conference paper supplement (https://openaccess.thecvf.com/content/WACV2024/html/Chong_P2D_Plug_and_WACV_2024_paper.html)
Supplement: Supplementary file 1 [file Chong_P2D_Plug_and_WACV_2024_supplemental.pdf]

# Supplementary for P2D: Plug and Play Discriminator for accelerating GAN frameworks

**EfficientNet** We extract 4 intermediate features from `tf_efficientnet_lite0` corresponding to spatial resolution  $\{64, 32, 16, 8\}$ . Classifier 1 in Table 1 corresponds to 64 resolution and so on.

**CLIP** For CLIP, we choose layers  $\{4, 6, 9, 11\}$  and the 512 dimensional vector output. The vector is then passed into classifier 5 in Table 2.

Because CLIP is based on vision transformers, each intermediate feature has a token length of 50. For each layer, we first pass the [CLS] token into a 2-layer MLP with *LReLU* to obtain  $c \in \mathbb{R}^{192}$ . We then resize the remaining 49 tokens into a  $768 \times 7 \times 7$  resolution feature, and concatenate  $c$  to each spatial location, forming a  $960 \times 7 \times 7$  feature. Because the features at all layers have the same dimension, we can use separate classifiers with the same specifications for each, see Table 2.

## 1. More results

We show more  $256 \times 256$  resolution results on 4 common datasets in Figure 1.

**FFHQ** is a common benchmark for generative models containing 70k high quality  $1024 \times 1024$  resolution images of faces.

**Churches** The LSUN Churches dataset contains around 1.2M images of outdoor church images at  $256 \times 256$  resolution.

**AFHQ** is a dataset containing  $512 \times 512$  resolution images of animal faces of cats, dogs, and wildlife animals. AFHQ contains 5000 images from each category, which we combine into a dataset of 15k.

**Art Painting** is a small dataset containing 1000 images of art paintings of resolution  $512 \times 512$ .

We resize all images to  $256 \times 256$  resolution using `area` interpolation in PyTorch before training P2D.

EfficientNet

| Classifier 1                        | Classifier 2                        | Classifier 3                        | Classifier 4                        |
|-------------------------------------|-------------------------------------|-------------------------------------|-------------------------------------|
| Resblock(in=24, out=256, stride=2)  | Resblock(in=40, out=512, stride=2)  | Resblock(in=112, out=512, stride=2) | Resblock(in=320, out=512, stride=2) |
| Resblock(in=256, out=512, stride=2) | Resblock(in=512, out=512, stride=2) | Resblock(in=512, out=512, stride=2) | MinibatchStd()                      |
| Resblock(in=512, out=512, stride=2) | Resblock(in=512, out=512, stride=2) | MiniBatchStd()                      | FC(in=8192, out=512)                |
| Resblock(in=512, out=512, stride=2) | MinibatchStd()                      | FC(in=8192, out=512)                | LReLU                               |
| MinibatchStd()                      | FC(in=8192, out=512)                | LReLU                               | FC(in=512, out=1)                   |
| FC(in=8192, out=512)                | LReLU                               | FC(in=512, out=1)                   |                                     |
| LReLU                               | FC(in=512, out=1)                   |                                     |                                     |
| FC(in=512, out=1)                   |                                     |                                     |                                     |

Table 1. Architecture of classifiers for EfficientNet backbone.

CLIP

| Classifier 1,2,3,4                  | Classifier 5        |
|-------------------------------------|---------------------|
| Resblock(in=960, out=768, stride=2) | FC(in=512, out=512) |
| Resblock(in=768, out=384, stride=1) | LReLU               |
| Resblock(in=384, out=192, stride=1) | FC(in=512, out=512) |
| MiniBatchStd()                      | LReLU               |
| FC(in=3072, out=512)                | FC(in=512, out=512) |
| LReLU                               | LReLU               |
| FC(in=512, out=1)                   | MiniBatchStd()      |
|                                     | FC(in=512, out=1)   |

Table 2. Architecture of classifiers for CLIP backbone.

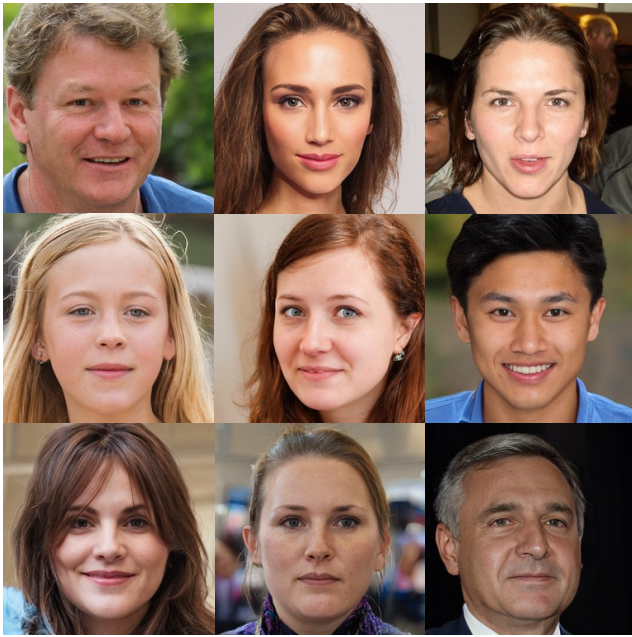

FFHQ

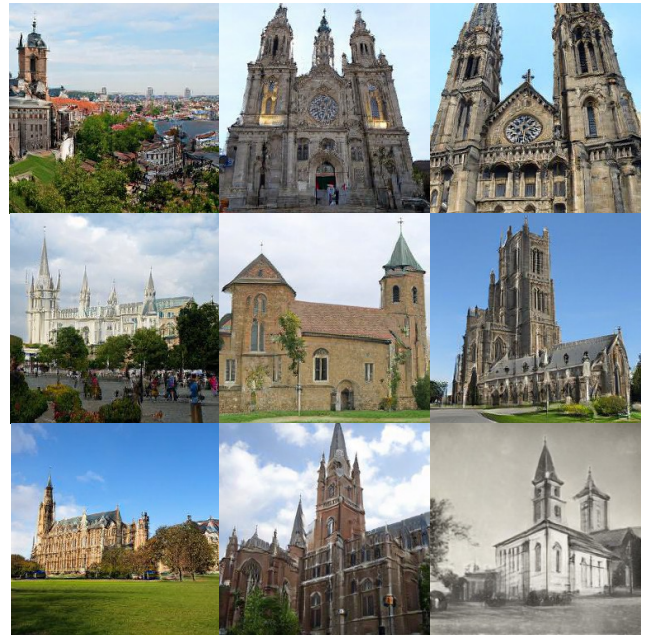

Churches

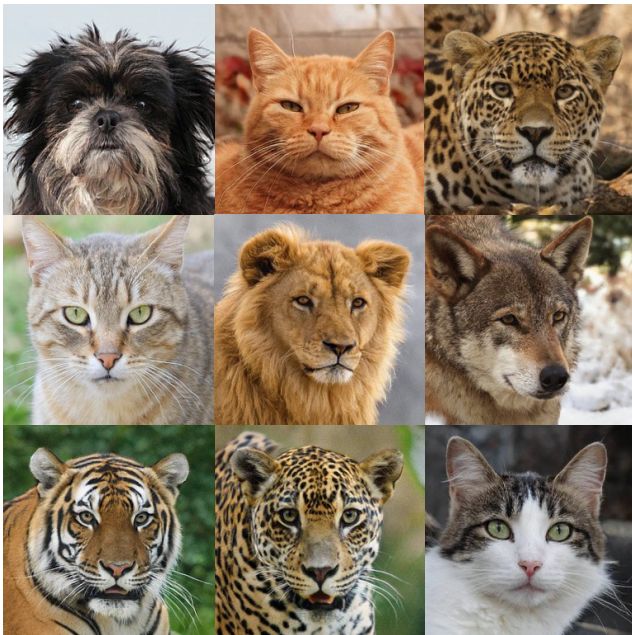

AFHQ

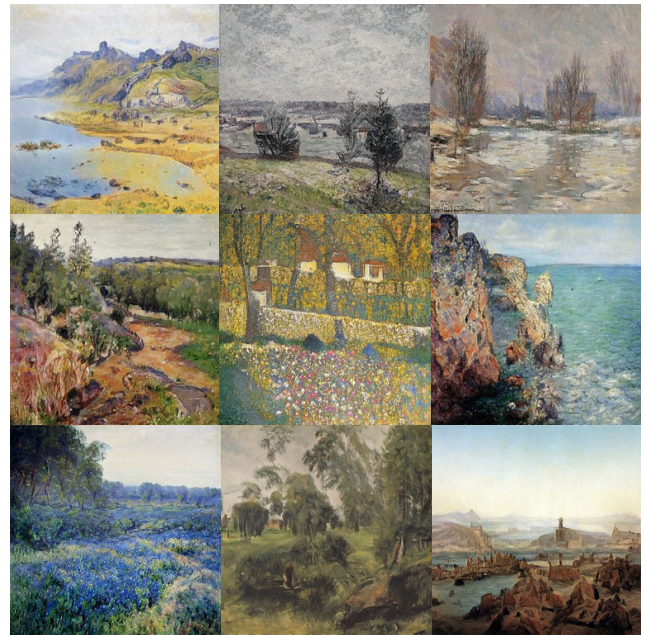

Art Painting

Figure 1. More random samples from P2D with StyleGAN2.
